# Supplementary material for: Awake prone position in COVID-19-related acute respiratory failure: a meta-analysis of randomized controlled trials
Source: Springer Nature journal article supplement (doi:10.1186/s12890-023-02442-3), 2023-04-26
Supplement: MOESM2 [file 25285626]

Additional File 2: Search strategy

(prone position) AND (awake OR non-intubated) AND (COVID-19 OR SARS-CoV-2)
