# Supplementary material for: Awake prone position in COVID-19-related acute respiratory failure: a meta-analysis of randomized controlled trials
Source: Springer Nature journal article supplement (doi:10.1186/s12890-023-02442-3), 2023-04-26

Additional File 4: Secondary outcomes -- Hospital LOS

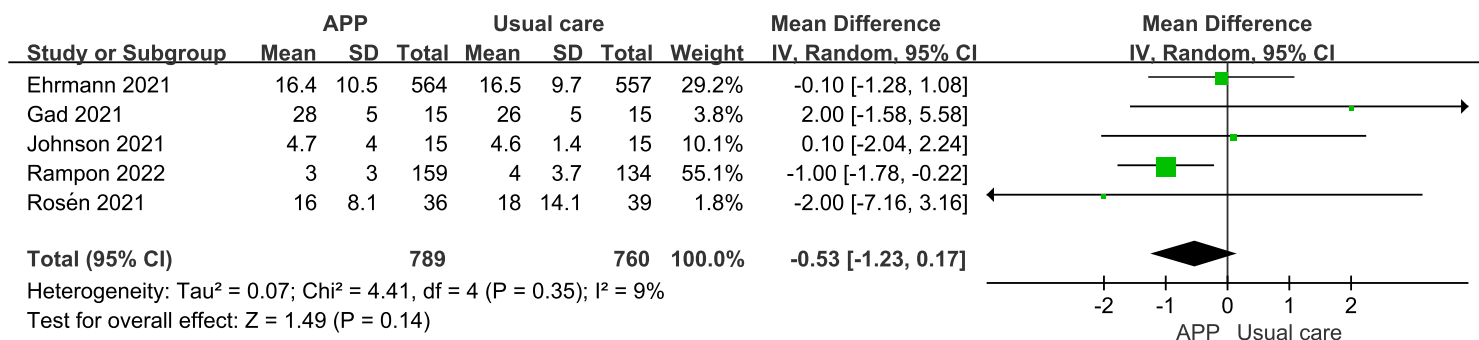

### Additional File 4: Secondary outcomes -- ICU LOS

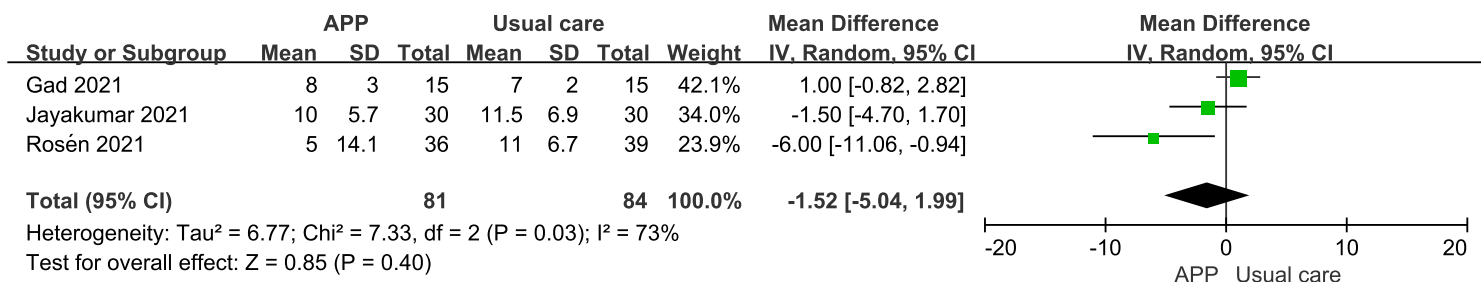

Supplement: MOESM4 [file 25285626]
