# Supplementary material for: Awake prone position in COVID-19-related acute respiratory failure: a meta-analysis of randomized controlled trials
Source: Springer Nature journal article supplement (doi:10.1186/s12890-023-02442-3), 2023-04-26
Supplement: MOESM5 [file 25285626]

Additional File 6: Publication bias analyzed by funnel plots

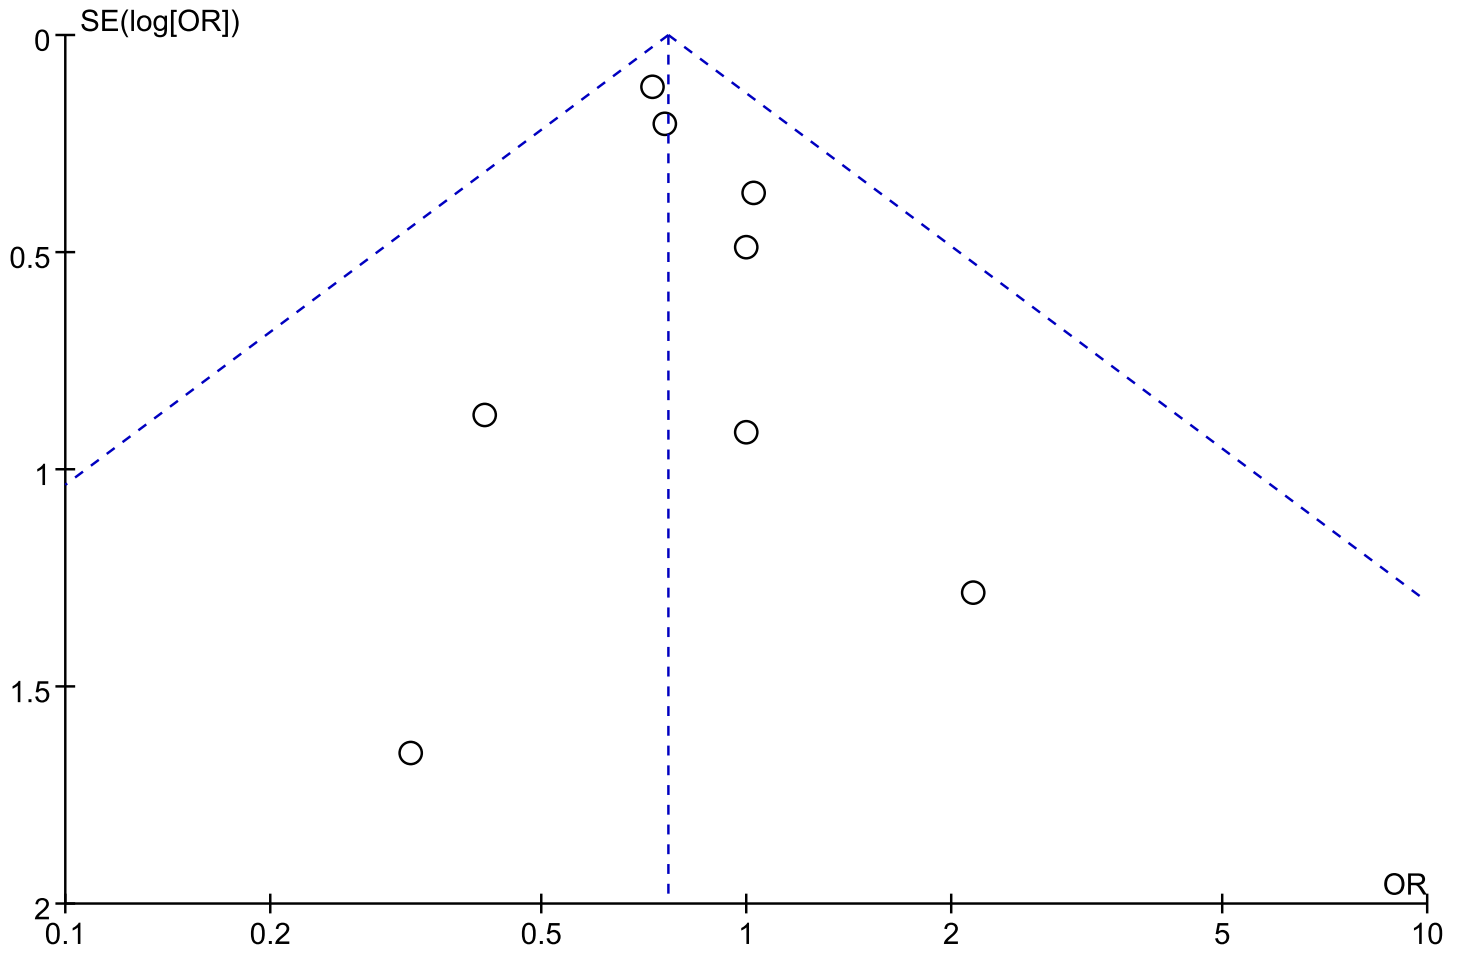

### Additional File 6: Publication bias analysis by trim and fill method

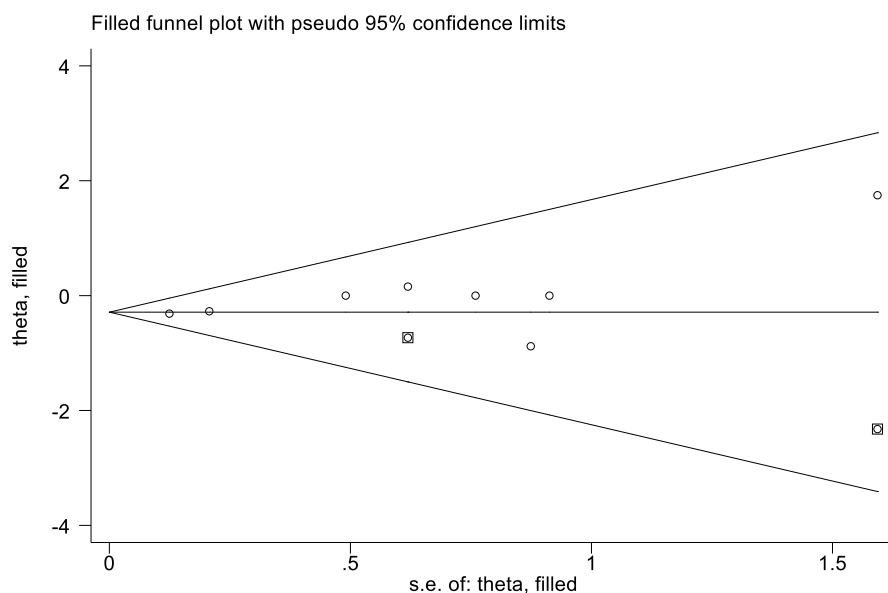

#### Meta-analysis

| Method | Pooled Est | 95% CI Lower | 95% CI Upper | Asymptotic z_value | Asymptotic p_value | No. of studies |
|--------|------------|--------------|--------------|--------------------|--------------------|----------------|
| Fixed  | -0.268     | -0.465       | -0.071       | -2.670             | 0.008              | 8              |
| Random | -0.268     | -0.465       | -0.071       | -2.670             | 0.008              |                |

Test for heterogeneity:  $Q = 3.206$  on 7 degrees of freedom ( $p = 0.865$ )

Moment-based estimate of between studies variance = 0.000

Trimming estimator: Linear

Meta-analysis type: Fixed-effects model

| iteration | estimate | Tn | # to trim | diff |
|-----------|----------|----|-----------|------|
| 1         | -0.268   | 26 | 2         | 36   |
| 2         | -0.288   | 27 | 2         | 2    |
| 3         | -0.288   | 27 | 2         | 0    |

#### Filled

#### Meta-analysis

| Method | Pooled Est | 95% CI Lower | 95% CI Upper | Asymptotic z_value | Asymptotic p_value | No. of studies |
|--------|------------|--------------|--------------|--------------------|--------------------|----------------|
|        |            |              |              |                    |                    |                |

-----+-----  
Fixed | -0.288 -0.482 -0.094 -2.910 0.004 10
