# Supplementary material for: Awake prone position in COVID-19-related acute respiratory failure: a meta-analysis of randomized controlled trials
Source: Springer Nature journal article supplement (doi:10.1186/s12890-023-02442-3), 2023-04-26
Supplement: MOESM6 [file 25285626]

**Additional File 5: Sensitivity analysis, by omitting each study with the remaining studies re-analyzed**

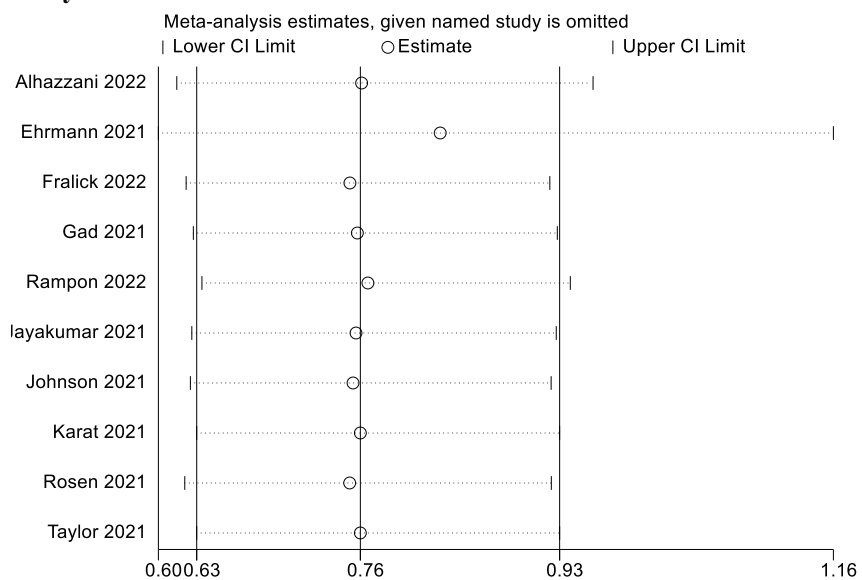

| <b>Study omitted</b> | <b>Estimate</b> | <b>[95% Conf. Interval]</b> |      |
|----------------------|-----------------|-----------------------------|------|
| Alhazzani 2022       | 0.77            | 0.61                        | 0.96 |
| Ehrmann 2021         | 0.83            | 0.60                        | 1.16 |
| Fralick 2022         | 0.76            | 0.62                        | 0.92 |
| Gad 2021             | 0.76            | 0.63                        | 0.93 |
| Rampon 2022          | 0.77            | 0.63                        | 0.94 |
| Jayakumar 2021       | 0.76            | 0.62                        | 0.93 |
| Johnson 2021         | 0.76            | 0.62                        | 0.92 |
| Karat 2021           | 0.76            | 0.63                        | 0.93 |
| Rosen 2021           | 0.76            | 0.62                        | 0.92 |
| Taylor 2021          | 0.76            | 0.63                        | 0.93 |
| Combined             | 0.76            | 0.63                        | 0.93 |
