# Supplementary material for: Awake prone position in COVID-19-related acute respiratory failure: a meta-analysis of randomized controlled trials
Source: Springer Nature journal article supplement (doi:10.1186/s12890-023-02442-3), 2023-04-26
Supplement: MOESM7 [file 25285626]

Additional File 7: Heterogeneity analyzed by Labbe plott

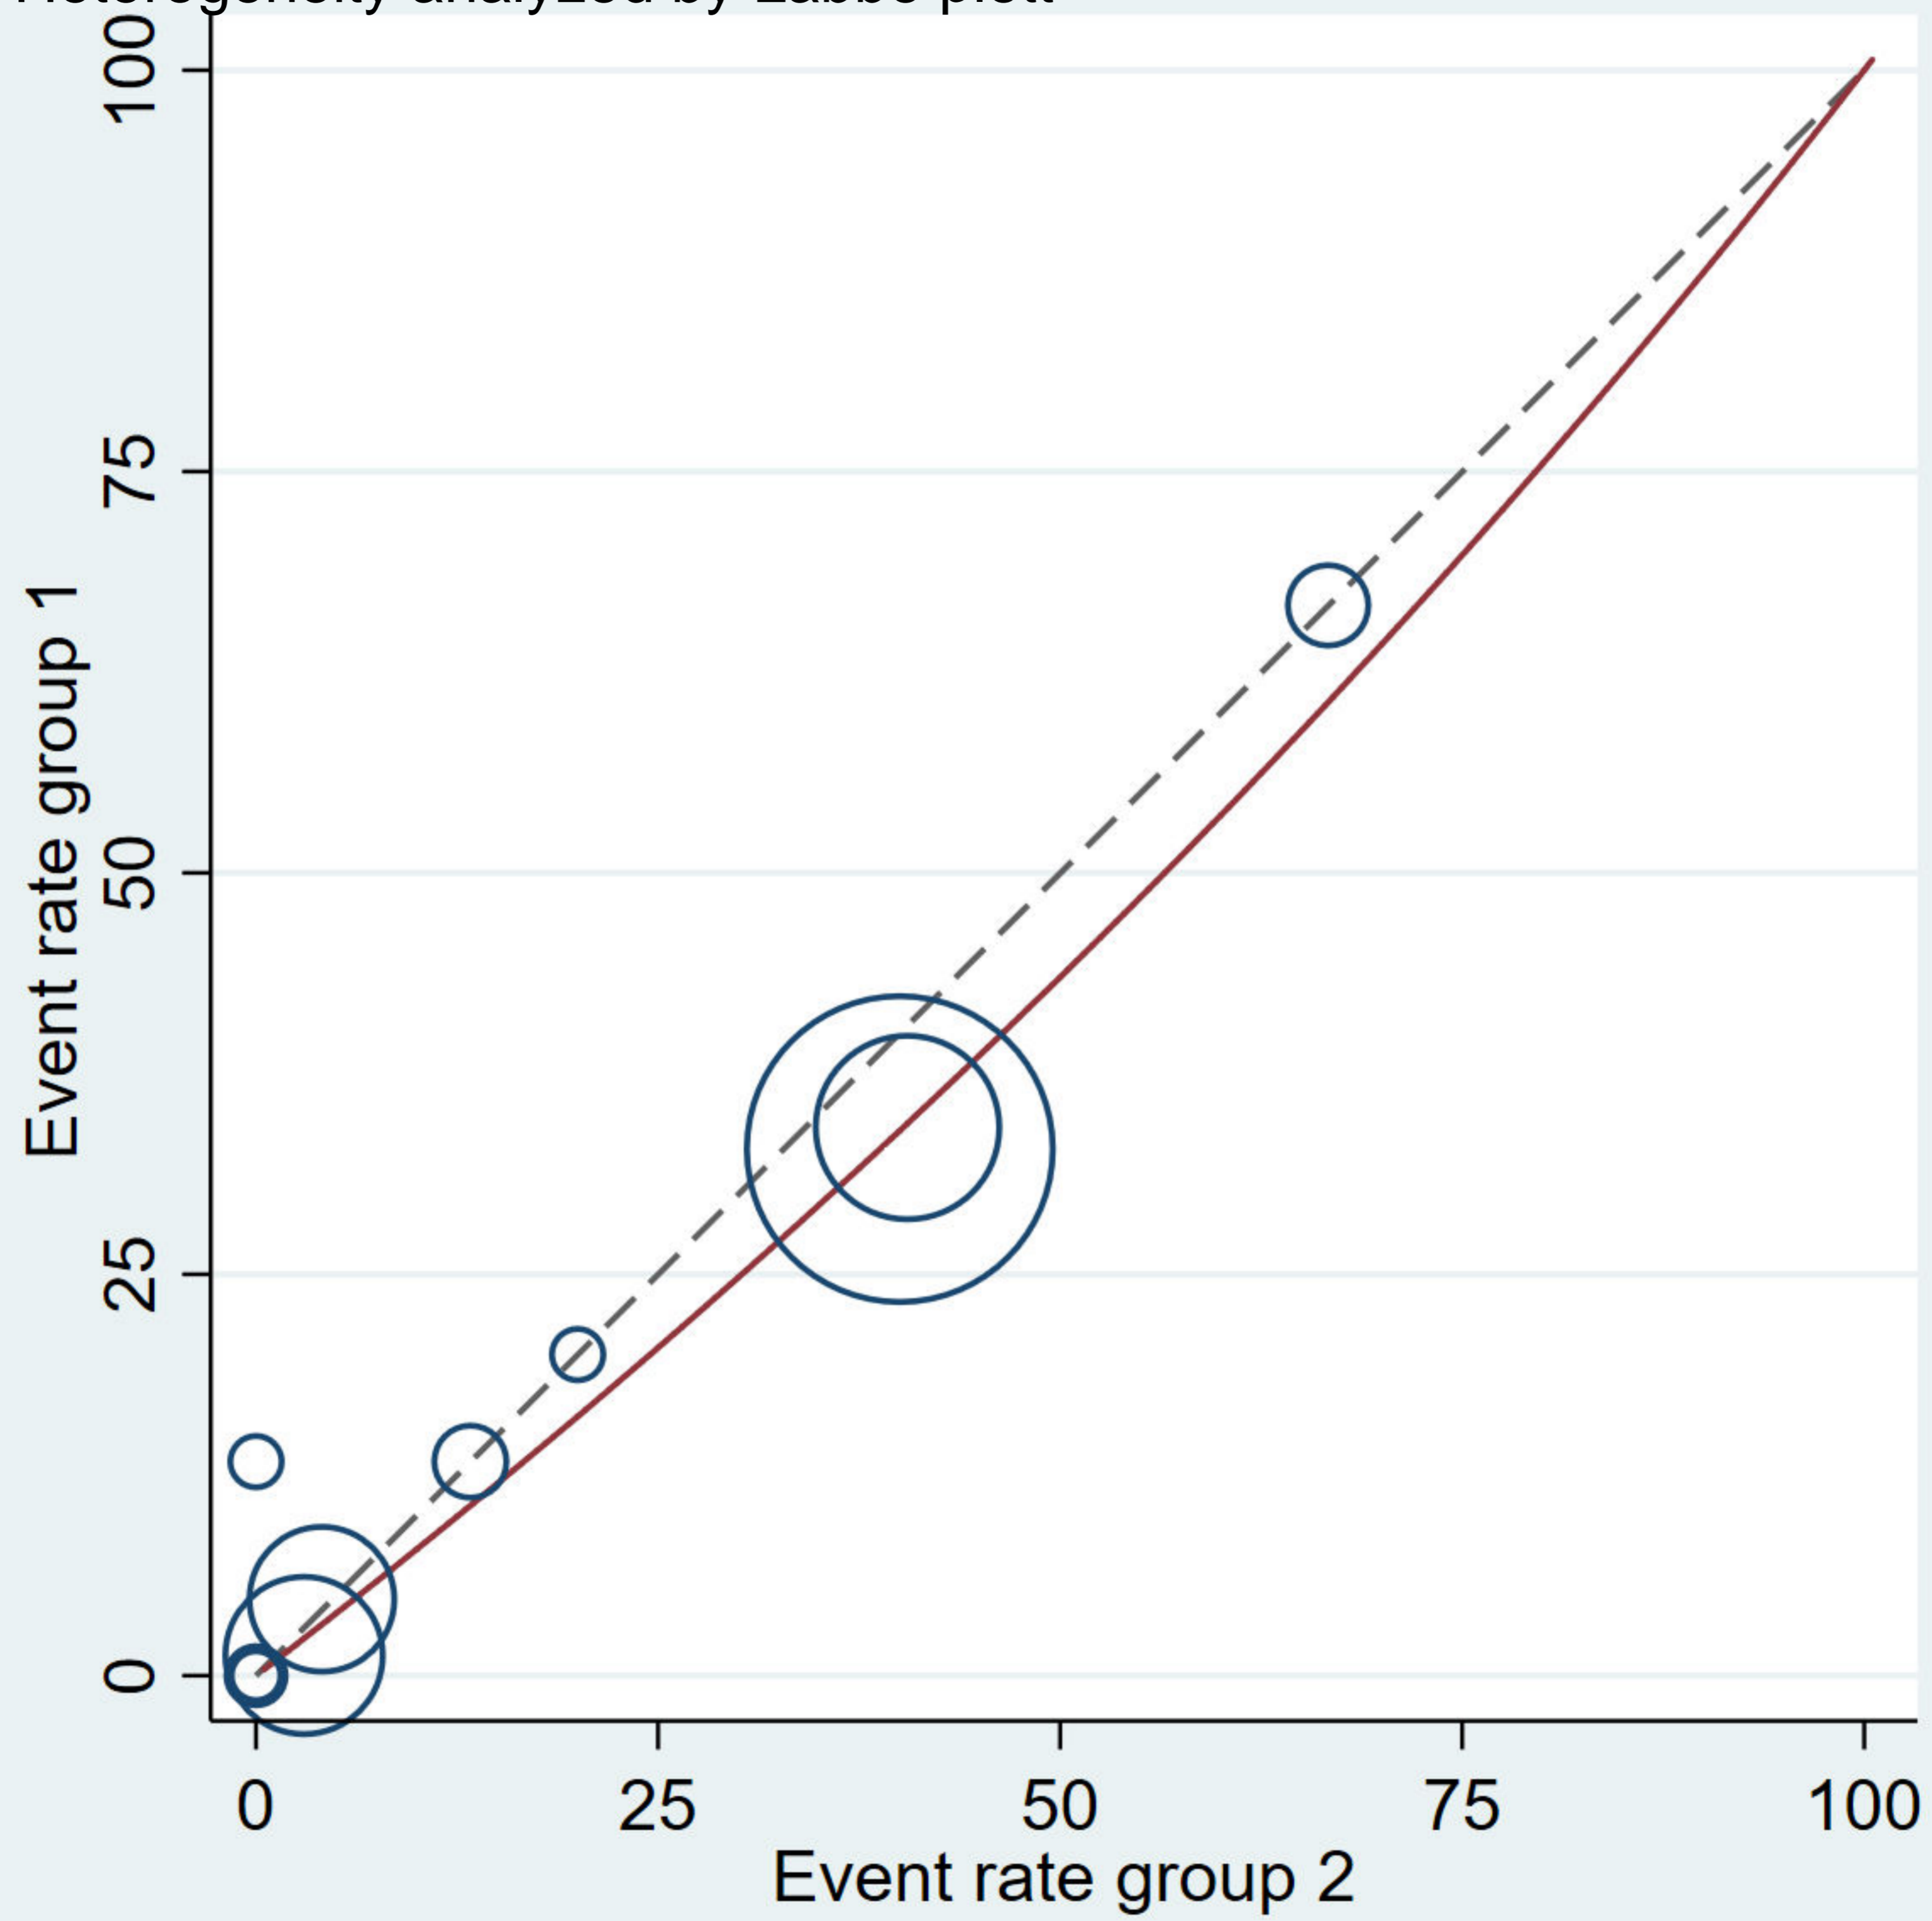

## Additional File 7: Heterogeneity analysis by meta-regression

### Patient number

Meta-regression Number of obs = 8  
 REML estimate of between-study variance tau2 = .008292  
 % residual variation due to heterogeneity I-squared\_res = 0.00%  
 Proportion of between-study variance explained Adj R-squared = 0.0%  
 With Knapp-Hartung modification

| logor   | Coef. | Std. Err. | t     | P>t   | [95% Conf. | Interval] |
|---------|-------|-----------|-------|-------|------------|-----------|
| Pats no | 0.00  | 0.00      | -0.79 | 0.459 | -0.0008242 | 0.0004218 |
| _cons   | -0.10 | 0.24      | -0.42 | 0.687 | -0.6765653 | 0.4773369 |

### Sites

Meta-regression Number of obs = 8  
 REML estimate of between-study variance tau2 = 0  
 % residual variation due to heterogeneity I-squared\_res = 0.00%  
 Proportion of between-study variance explained Adj R-squared = 0.0%  
 With Knapp-Hartung modification

| logor | Coef. | Std. Err. | t     | P>t   | [95% Conf. | Interval] |
|-------|-------|-----------|-------|-------|------------|-----------|
| sites | -0.01 | 0.01      | -0.86 | 0.421 | -0.026138  | 0.0125074 |
| _cons | -0.05 | 0.27      | -0.18 | 0.866 | -0.7187614 | 0.6224851 |

### Intubation rate

Meta-regression Number of obs = 8  
 REML estimate of between-study variance tau2 = 0  
 % residual variation due to heterogeneity I-squared\_res = 0.00%  
 Proportion of between-study variance explained Adj R-squared = 0.0%  
 With Knapp-Hartung modification

| logor           | Coef.    | Std. Err. | t     | P>t   | [95% Conf. | Interval] |
|-----------------|----------|-----------|-------|-------|------------|-----------|
| Intubation rate | -0.55416 | 1.09987   | -0.5  | 0.632 | -3.24545   | 2.137122  |
| _cons           | -0.11941 | 0.40815   | -0.29 | 0.78  | -1.11811   | 0.879302  |

### APP time

Meta-regression Number of obs = 6  
 REML estimate of between-study variance tau2 = 0  
 % residual variation due to heterogeneity I-squared\_res = 0.00%  
 Proportion of between-study variance explained Adj R-squared = 0.0%  
 With Knapp-Hartung modification

| logor    | Coef.      | Std. Err. | t     | P>t  | [95% Conf. | Interval] |
|----------|------------|-----------|-------|------|------------|-----------|
| APP time | 0.0397002  | 0.12      | 0.34  | 0.76 | -0.3332885 | 0.4126889 |
| _cons    | -0.4720862 | 0.61      | -0.77 | 0.50 | -2.416794  | 1.472622  |

### Settings

Meta-regression Number of obs = 8

REML estimate of between-study variance  
% residual variation due to heterogeneity  
Proportion of between-study variance explained

tau2 = 0  
I-squared\_res = 0.00%  
Adj R-squared = 0.0%

With Knapp-Hartung modification

| logor       | Coef.      | Std. Err. | t     | P>t  | [95% Conf. | Interval] |
|-------------|------------|-----------|-------|------|------------|-----------|
| Setting ICU | -0.2667216 | 0.49      | -0.54 | 0.61 | -1.47      | 0.9384186 |
| _cons       | -0.0130897 | 0.48      | -0.03 | 0.98 | -1.19      | 1.165552  |
